# Supplementary material for: The transition from HIF-1 to HIF-2 during prolonged hypoxia results from reactivation of PHDs and HIF1A mRNA instability
Source: PubMed Central journal article supplement (PMC9730601; doi:10.1186/s11658-022-00408-7), 2022-12-08

**Supplemental material for Figure 1 – uncropped Western blots**

**Replicates 1 and 2**

**HIF-1 $\alpha$**

Sample Set 1                      Sample Set 2

Time of hypoxic exposure (hours):    0    4    8    24    0    4    8    24

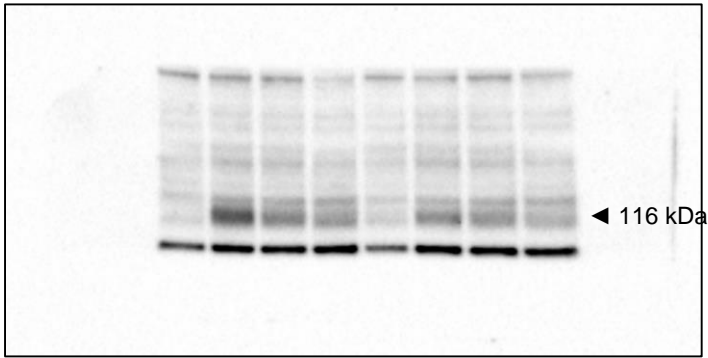

**HIF-2 $\alpha$**

Sample Set 1                      Sample Set 2

Time of hypoxic exposure (hours):    0    4    8    24    0    4    8    24

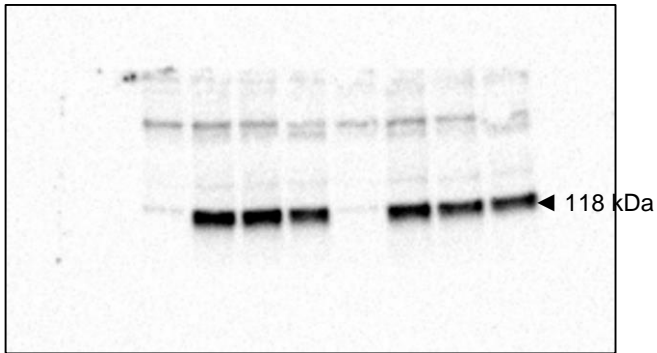

**Total protein**

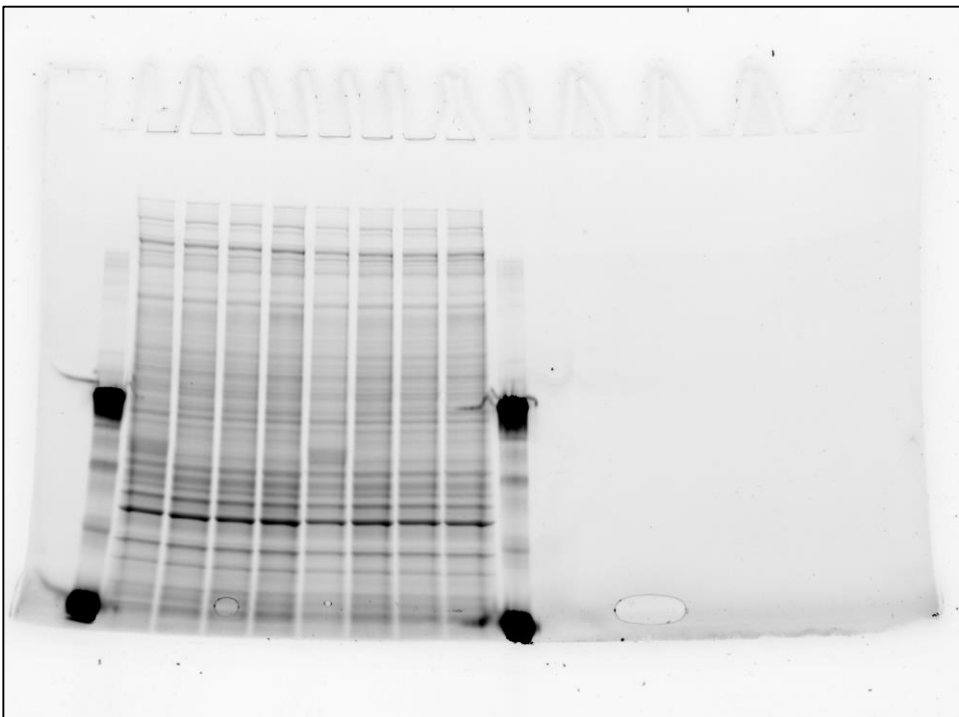

**Replicates 1 and 2**

**$\beta$ -actin**

| Time of hypoxic exposure (hours): | Sample Set 1 |   |   |    | Sample Set 2 |   |   |    |
|-----------------------------------|--------------|---|---|----|--------------|---|---|----|
|                                   | 0            | 4 | 8 | 24 | 0            | 4 | 8 | 24 |

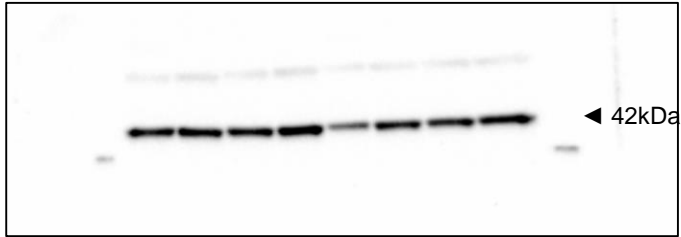

**Replicate 3**

**HIF-1 $\alpha$**

| Time of hypoxic exposure (hours): | Sample Set 1 |   |   |    |
|-----------------------------------|--------------|---|---|----|
|                                   | 0            | 4 | 8 | 24 |

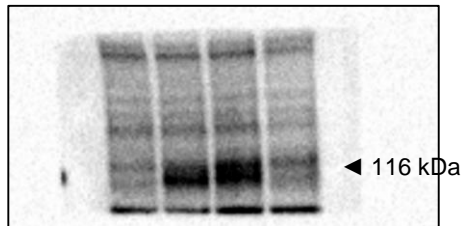

**HIF-2 $\alpha$**

| Time of hypoxic exposure (hours): | Sample Set 1 |   |   |    |
|-----------------------------------|--------------|---|---|----|
|                                   | 0            | 4 | 8 | 24 |

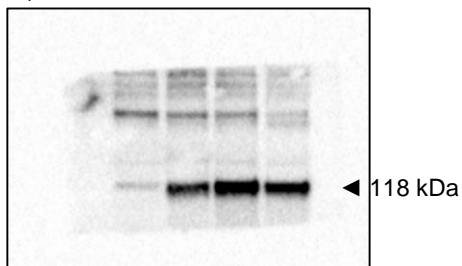

**$\beta$ -actin**

| Time of hypoxic exposure (hours): | Sample Set HIF-1 $\alpha$ |   |   |    | Sample Set HIF-2 $\alpha$ |   |   |    |
|-----------------------------------|---------------------------|---|---|----|---------------------------|---|---|----|
|                                   | 0                         | 4 | 8 | 24 | 0                         | 4 | 8 | 24 |

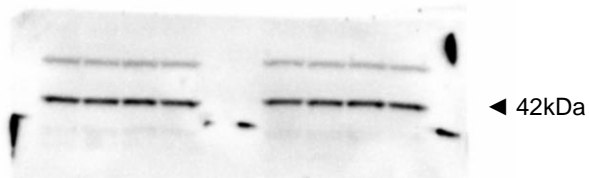

**Supplemental material for Figure 1 – uncropped Western blots**

**Replicate 3**

Total protein

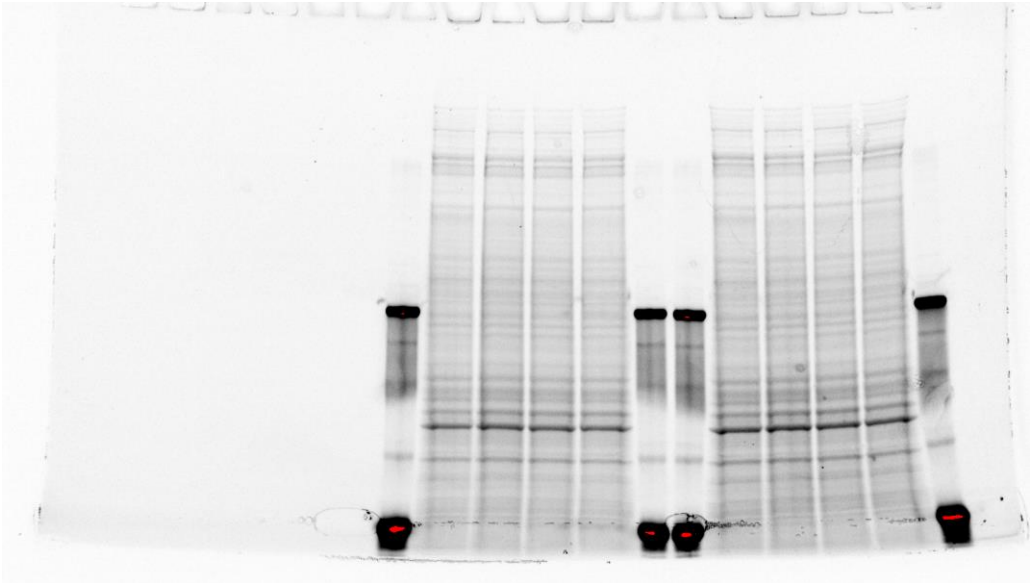

**Replicate 4**

**HIF-1 $\alpha$**

Sample Set 1

Time of hypoxic exposure (hours): 0 4 8 24

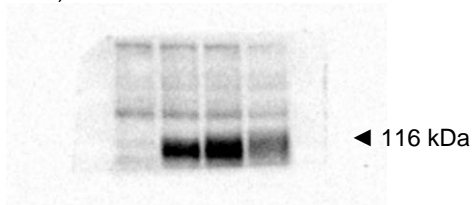

**HIF-2 $\alpha$**

Sample Set 1

Time of hypoxic exposure (hours): 0 4 8 24

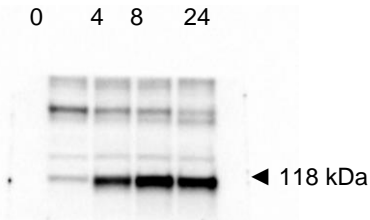

**$\beta$ -actin**

Sample Set HIF-1 $\alpha$  Sample Set HIF-2 $\alpha$

Time of hypoxic exposure (hours): 0 4 8 24 0 4 8 24

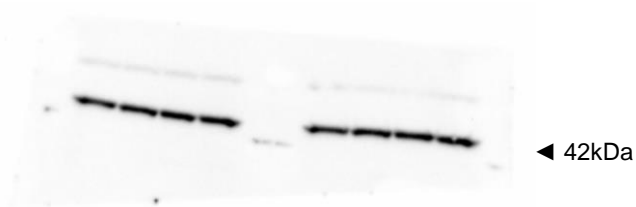

**Supplemental material for Figure 1 – uncropped Western blots**

**Replicate 4**

Total protein

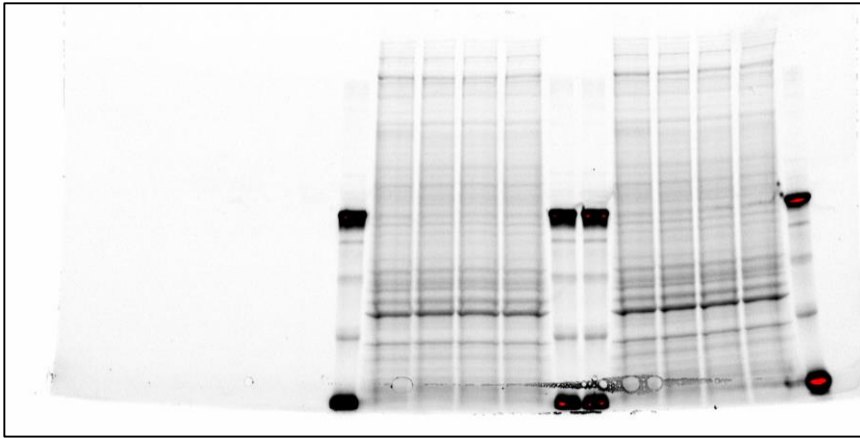

**Replicate 5&6**

**HIF-1 $\alpha$**

Time of hypoxic exposure (hours)

Sample Set 1      Sample Set 2  
0 4 8 24      0 4 8 24

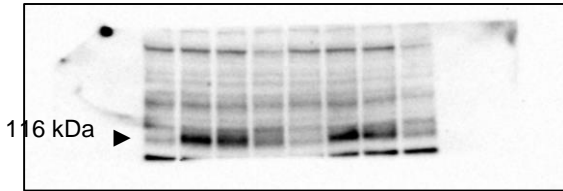

**HIF-2 $\alpha$**

Sample Set 1      Sample Set 2  
0 4 8 24      0 4 8 24

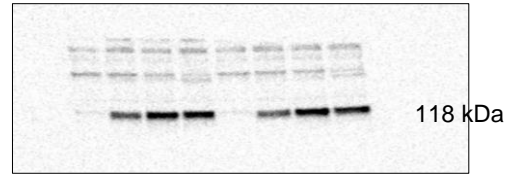

Total protein

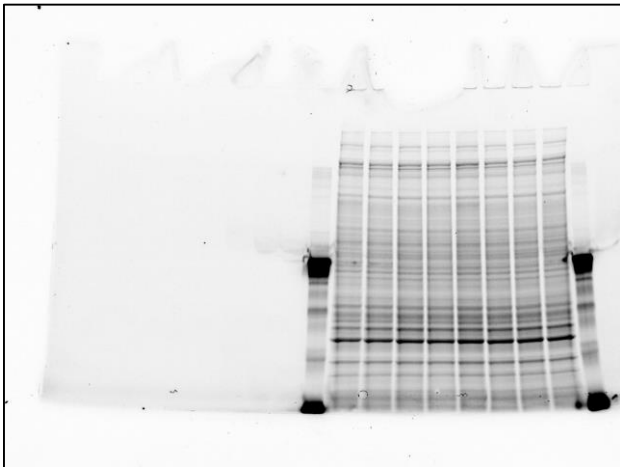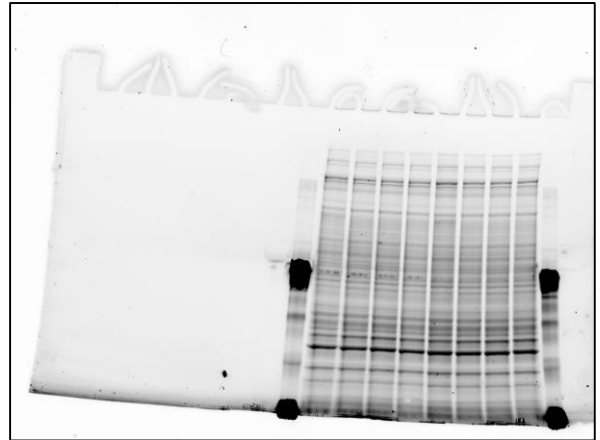

# Supplemental material for Figure 2 – uncropped Western blots

## Replicate 1

### HIF-1 $\alpha$

Time of hypoxic exposure (hours):

0                      4                      8                      16

Cycloheximide treatment (minutes)

0   0   20   45   90   0   20   45   90   0   20   45   90

116 kDa

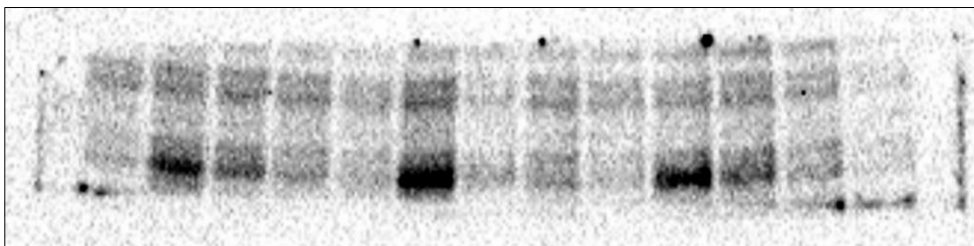

Total protein

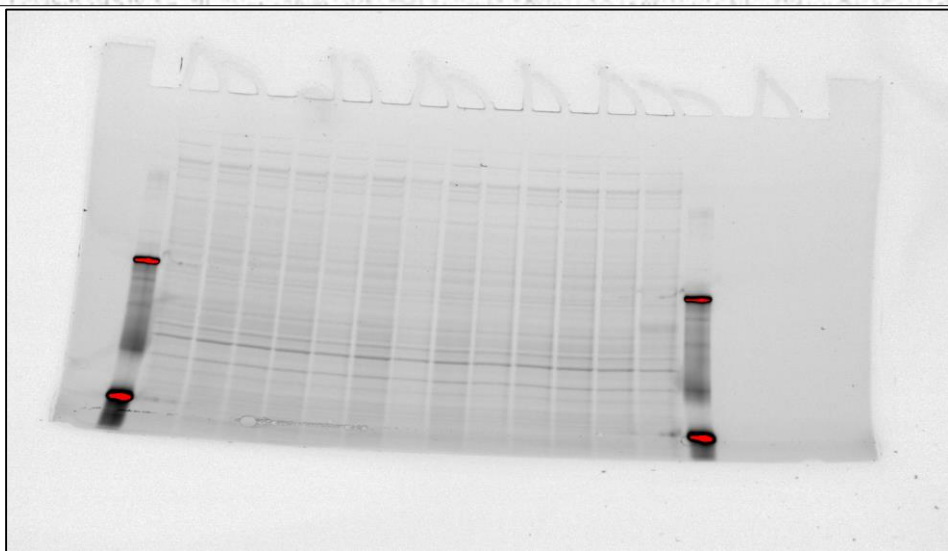

## Replicate 2

### HIF-1 $\alpha$

Time of hypoxic exposure (hours):

0                      4                      8                      16

Cycloheximide treatment (minutes)

0   0   20   45   90   0   20   45   90   0   20   45   90

116 kDa

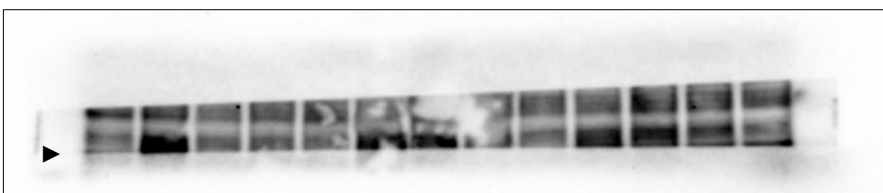

Total protein

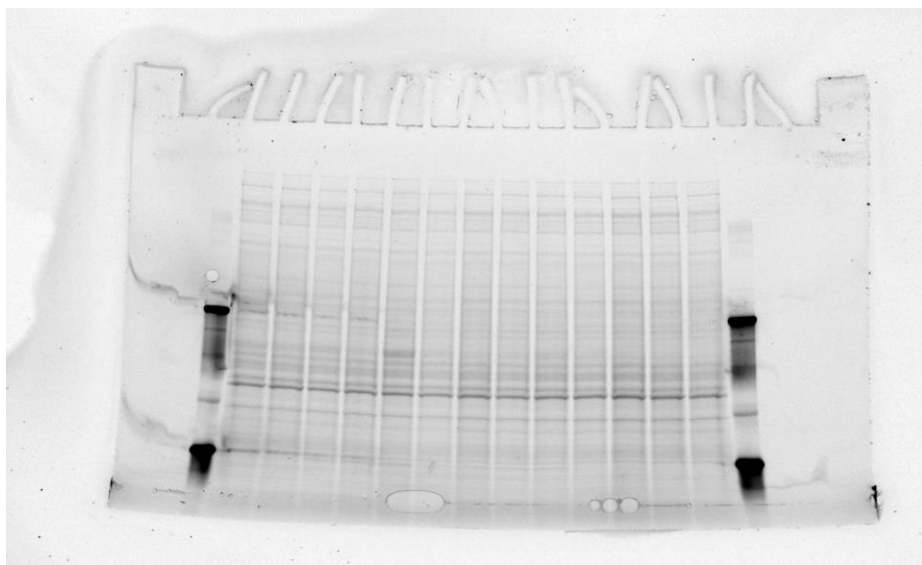

**Supplemental material for Figure 2 – uncropped Western blots**

**Replicate 3**

**HIF-1 $\alpha$**

Time of hypoxic exposure (hours):

0                      4                      8                      16

Cycloheximide treatment (minutes)

0   0   20   45   90   0   20   45   90   0   20   45   90

116 kDa ▶

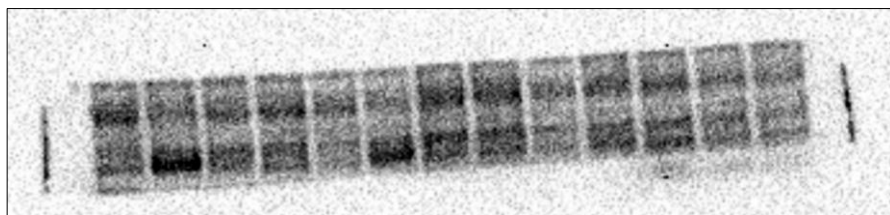

**Total protein**

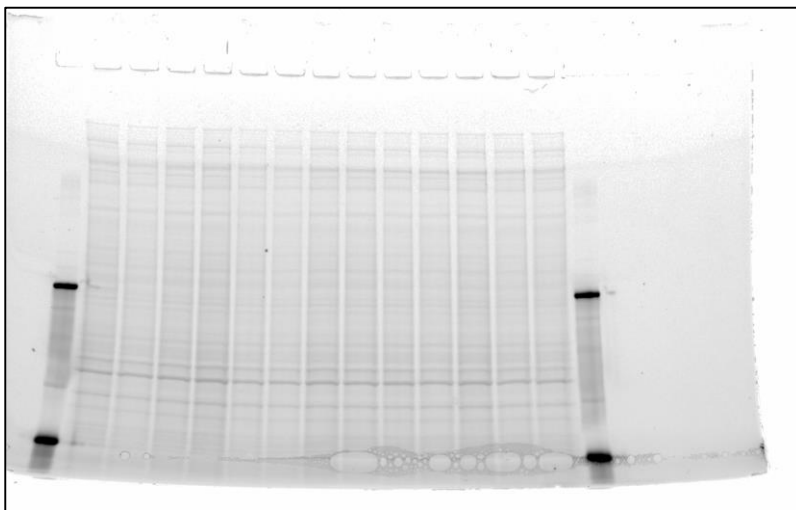

**Replicate 4**

**HIF-1 $\alpha$**

Time of hypoxic exposure (hours):

0                      4                      8                      16

Cycloheximide treatment (minutes)

0   0   20   45   90   0   20   45   90   0   20   45   90

116 kDa ▶

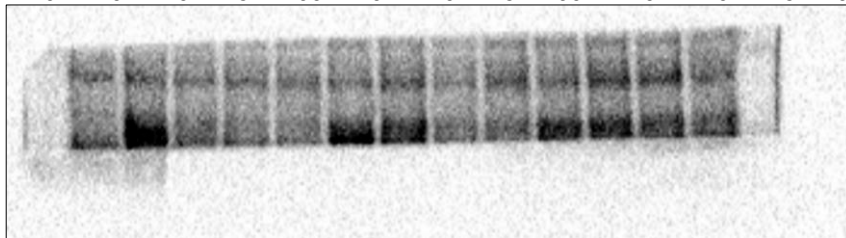

**Total protein**

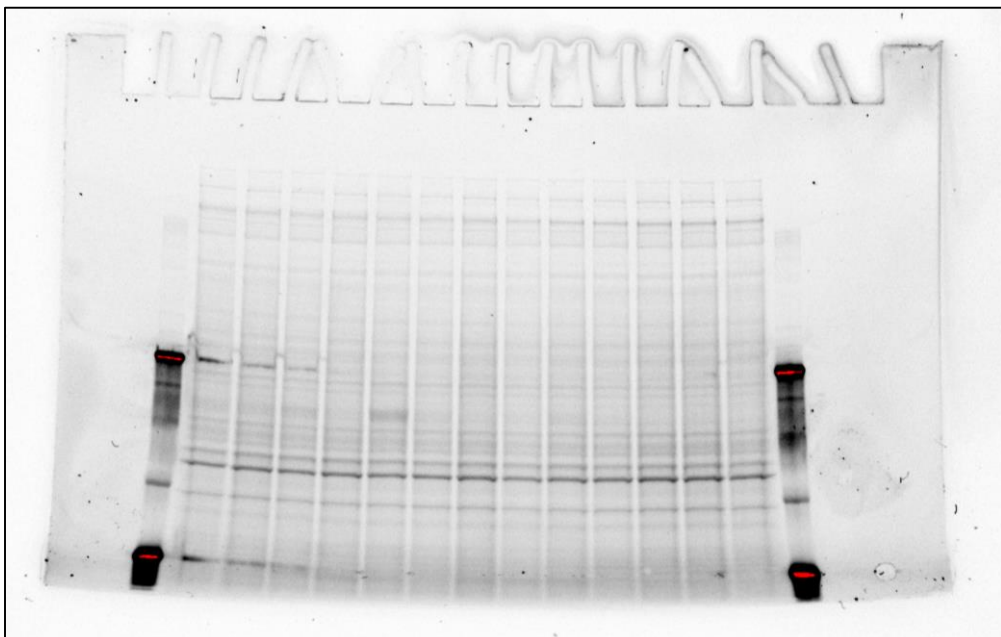

# Supplemental material for Figure 3 – uncropped Western blots

## Replicate 1

### HIF-2 $\alpha$

Time of hypoxic exposure (hours):      0                      4                      8                      16

Cycloheximide treatment (minutes)      0    0    20    45    90    0    20    45    90    0    20    45    90

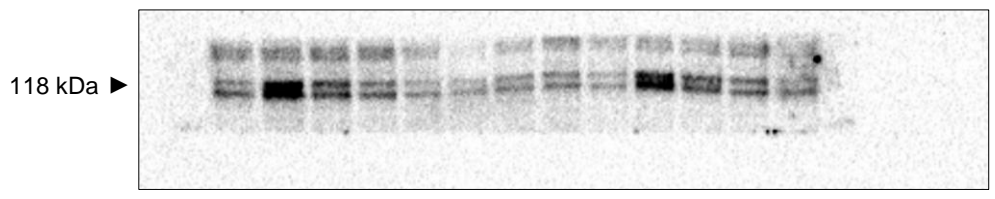

### Total protein

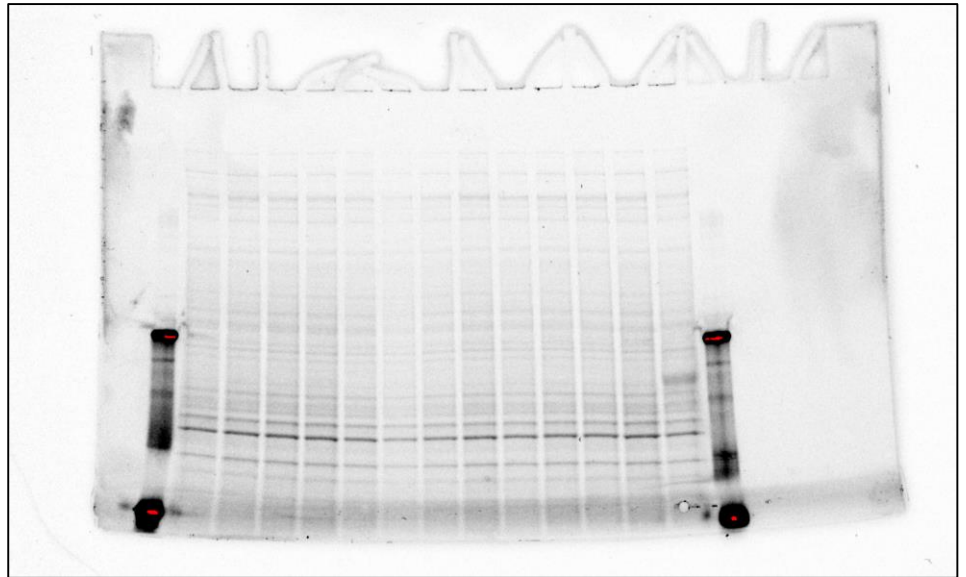

## Replicate 2

### HIF-2 $\alpha$

Time of hypoxic exposure (hours):      0                      4                      8                      16

Cycloheximide treatment (minutes)      0    0    20    45    90    0    20    45    90    0    20    45    90

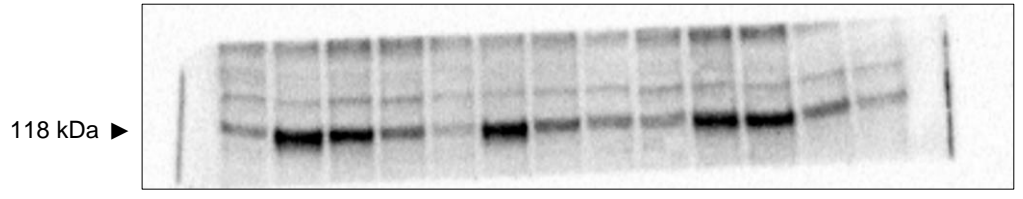

### Total protein

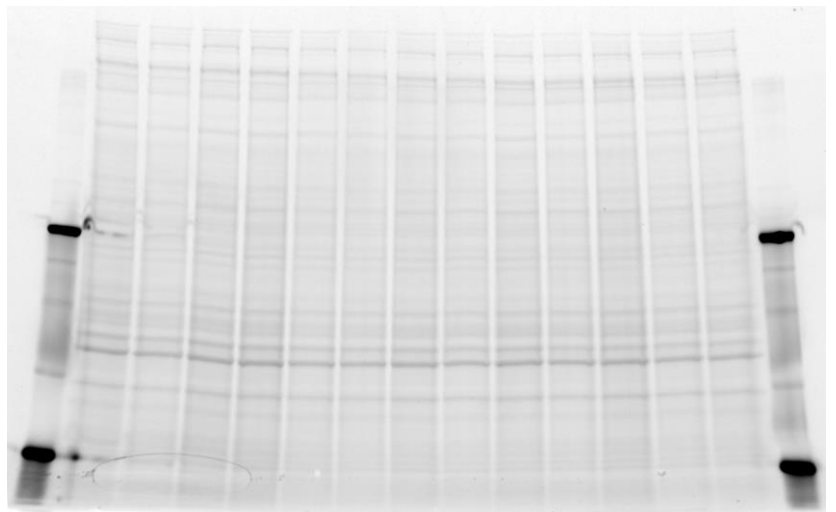

# Supplemental material for Figure 3 – uncropped Western blots

## Replicate 3

### HIF-2 $\alpha$

Time of hypoxic exposure (hours):

0                      4                      8                      16

Cycloheximide treatment (minutes)

0   0   20   45   90   0   20   45   90   0   20   45   90

118 kDa ▶

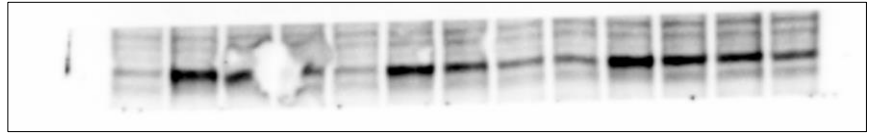

Total protein

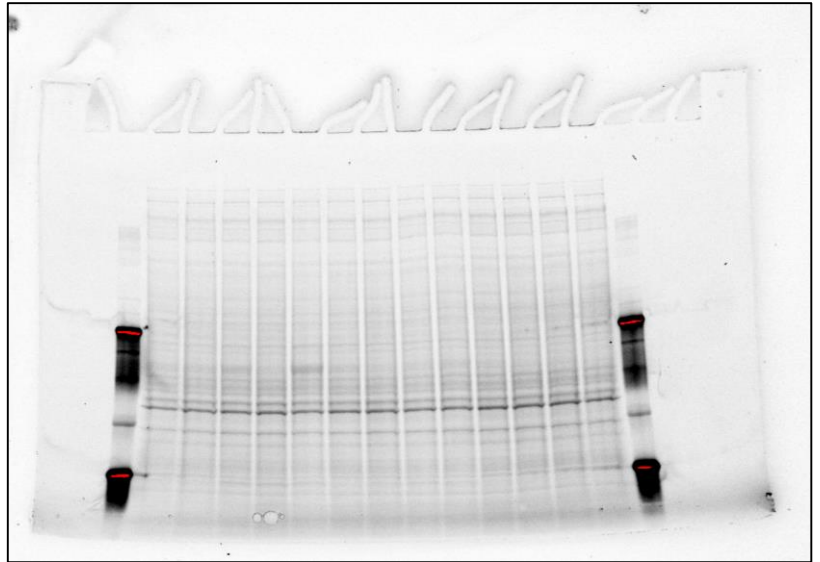

## Replicate 4

### HIF-2 $\alpha$

Time of hypoxic exposure (hours):

0                      4                      8                      16

Cycloheximide treatment (minutes)

0   0   20   45   90   0   20   45   90   0   20   45   90

118 kDa ▶

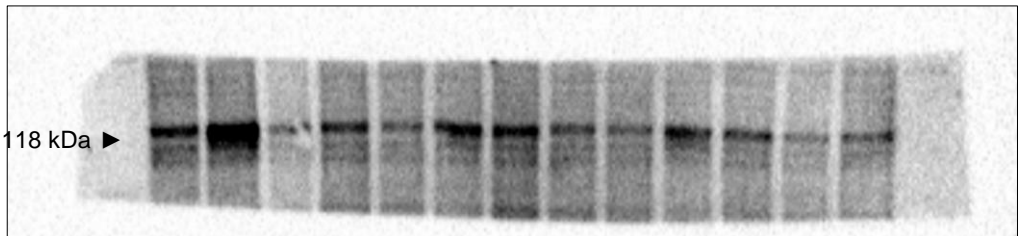

Total protein

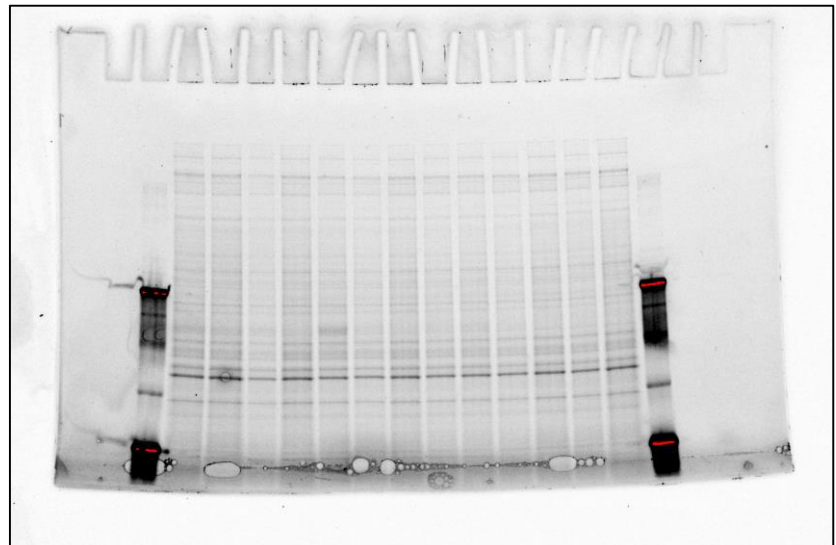



**Supplemental material for Figure 3 – uncropped Western blots**

**Replicate 5**

**HIF-2 $\alpha$**

Time of hypoxic exposure (hours):

0                      4                      8                      16

Cycloheximide treatment (minutes)

0   0   20   45   90   0   20   45   90   0   20   45   90

118 kDa ▶

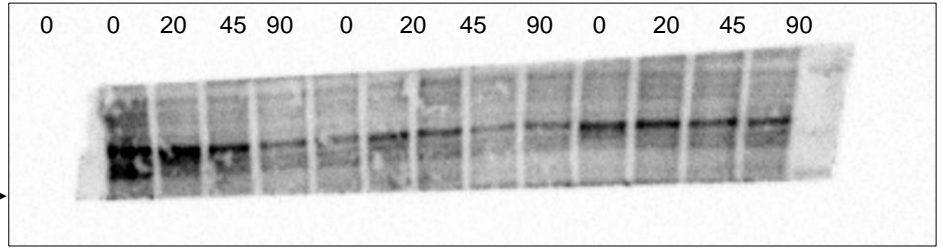

**Total protein**

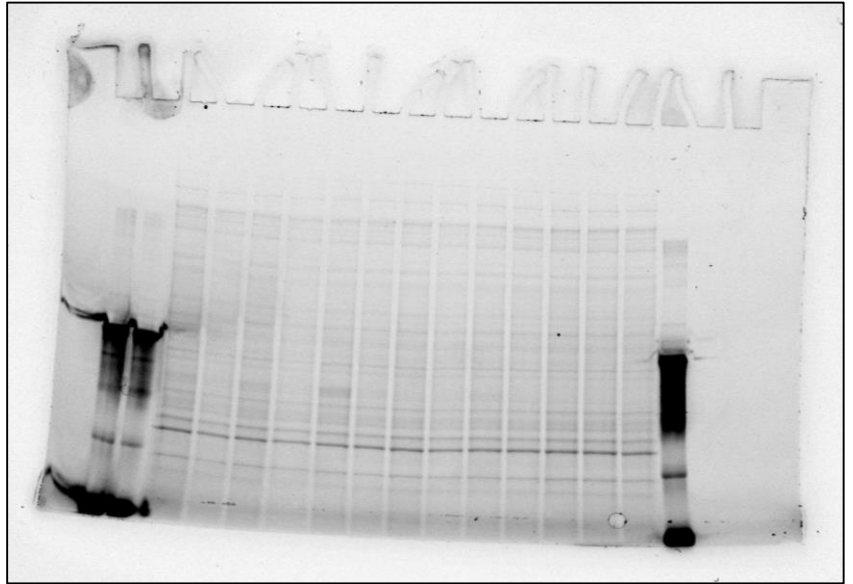

**Supplemental material for Figure 5 – uncropped Western blots**

**Replicate 1**

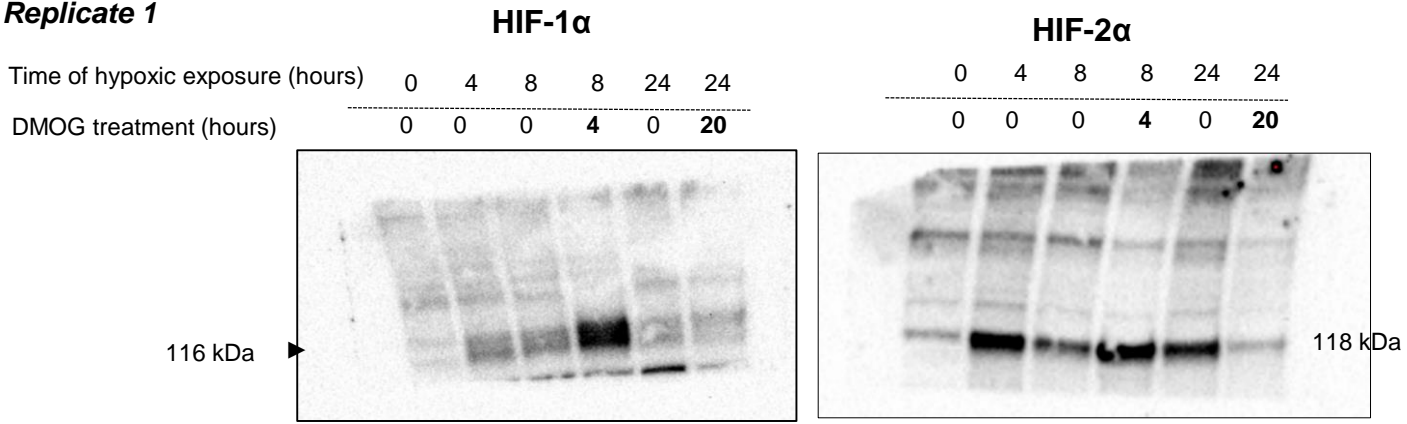

**Total protein**

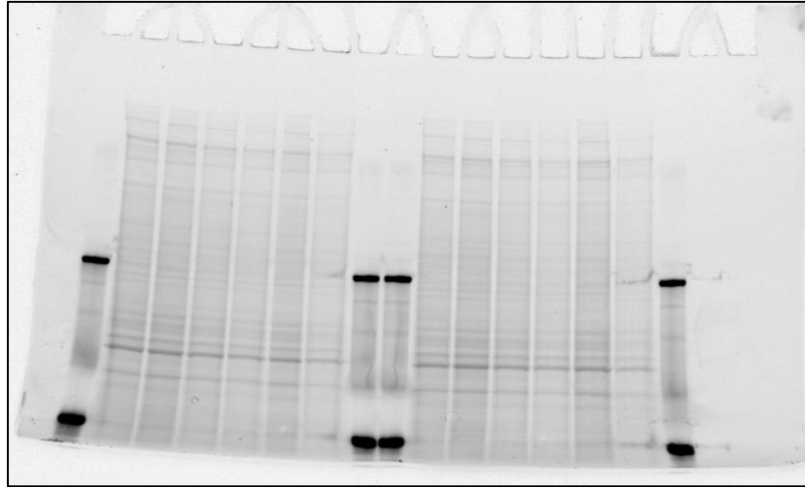

**Replicate 2**

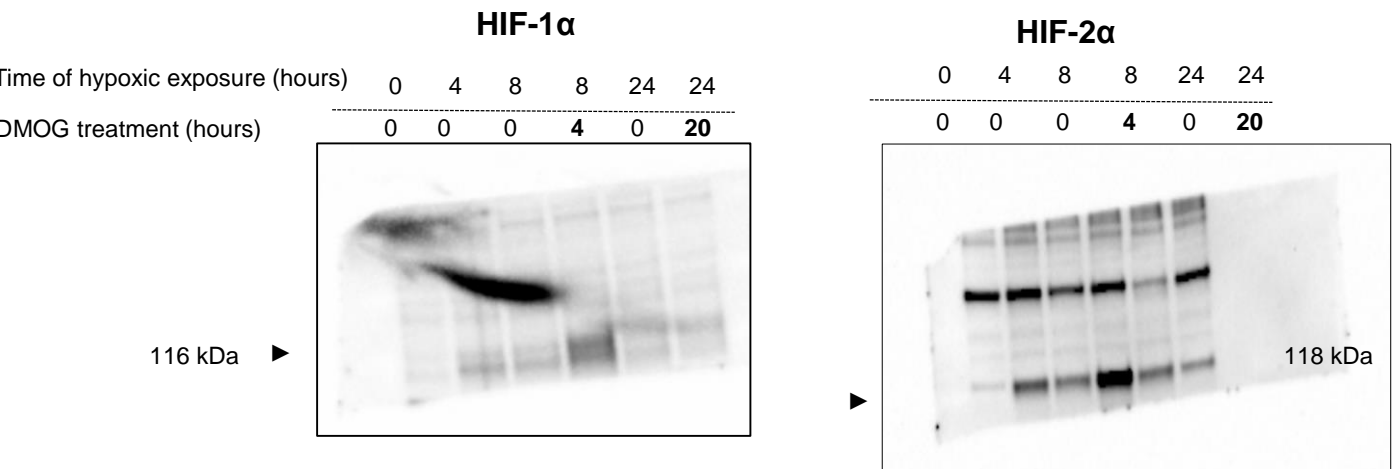

**Supplemental material for Figure 5 – uncropped Western blots**

**Replicate 2**

Total protein

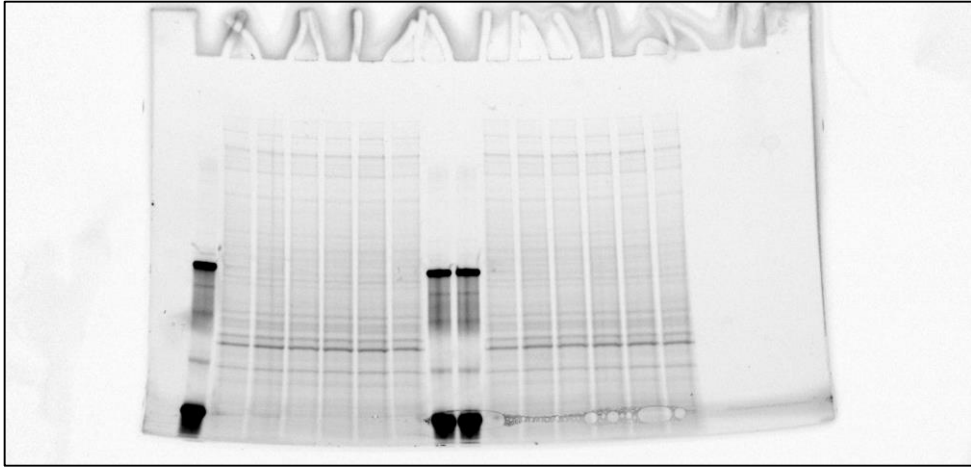

**Replicate 3**

**HIF-1 $\alpha$**

**HIF-2 $\alpha$**

Time of hypoxic exposure (hours)

0 4 8 8 24 24

0 4 8 8 24 24

DMOG treatment (hours)

0 0 0 4 0 20

0 0 0 4 0 20

116 kDa

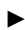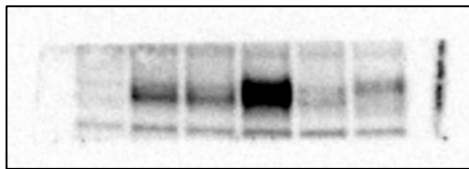

118 kDa

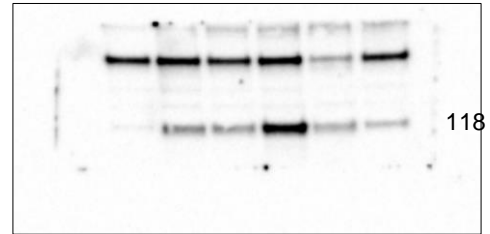

Total protein

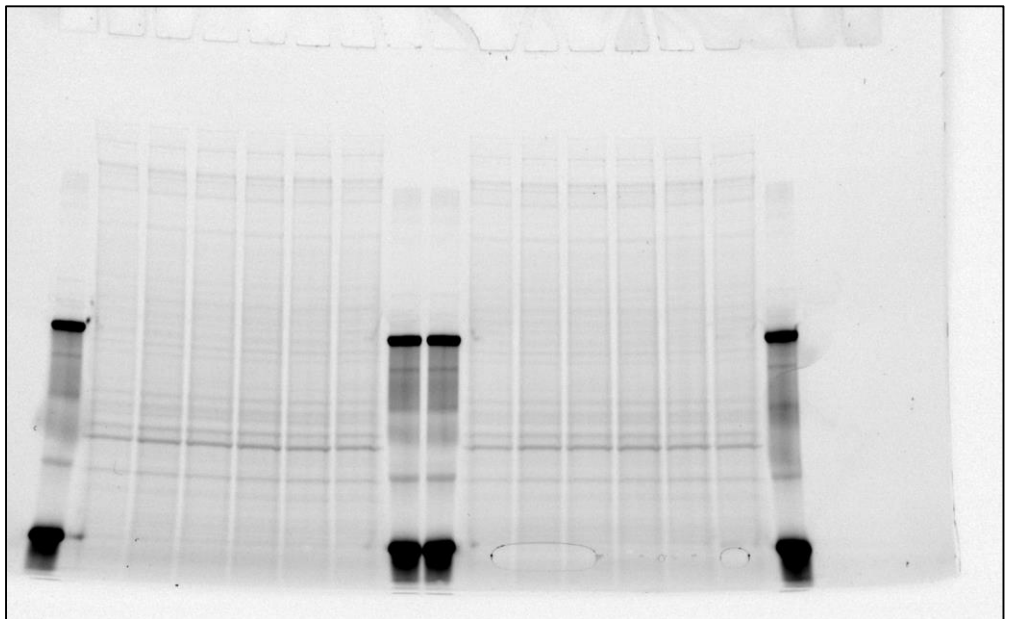

**Supplemental material for Figure 5 – uncropped Western blots**

**Replicates 4 & 5**

|                                  | HIF-2 $\alpha$ |   |   |   |    |    | HIF-2 $\alpha$ |   |   |   |    |    |
|----------------------------------|----------------|---|---|---|----|----|----------------|---|---|---|----|----|
| Time of hypoxic exposure (hours) | 0              | 4 | 8 | 8 | 24 | 24 | 0              | 4 | 8 | 8 | 24 | 24 |
| DMOG treatment (hours)           | 0              | 0 | 0 | 4 | 0  | 20 | 0              | 0 | 0 | 4 | 0  | 20 |

118 kDa  $\blacktriangleright$

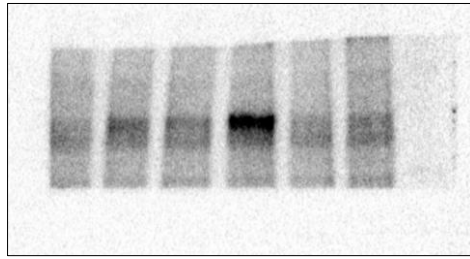

118 kDa

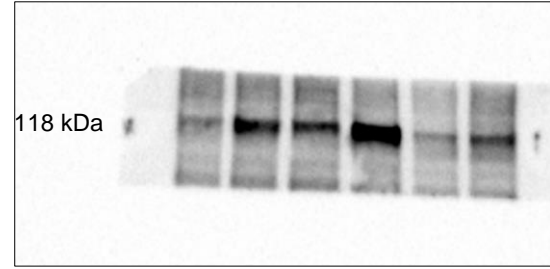

**Total protein**

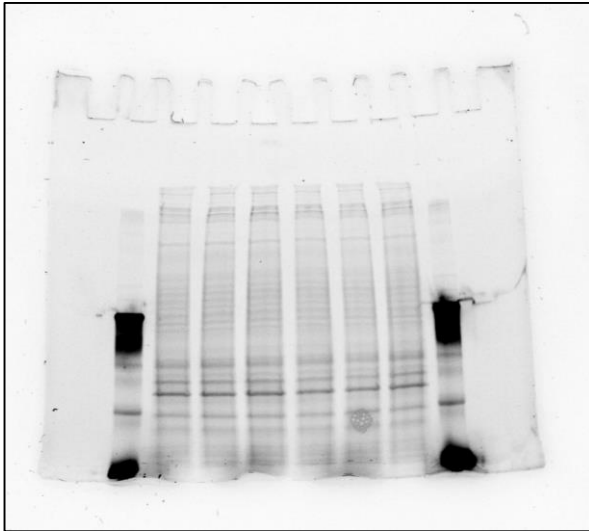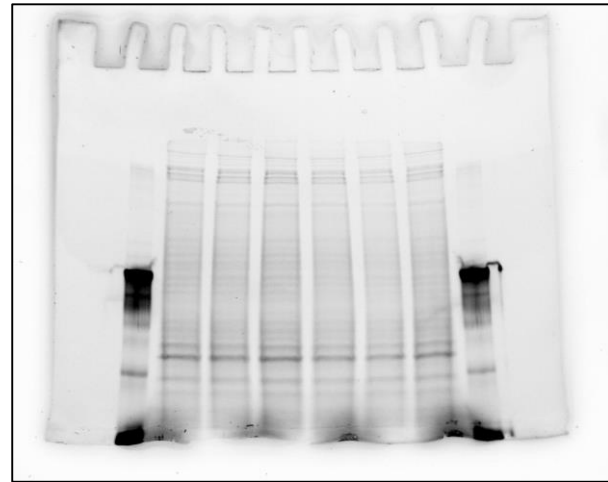

**Supplemental material for Figure 6 – uncropped Western blots**

**Replicate 1**

**HIF-1 $\alpha$**

|                                              |   |   |   |   |    |    |
|----------------------------------------------|---|---|---|---|----|----|
| Time of hypoxic exposure (hours)             | 0 | 4 | 8 | 8 | 24 | 24 |
| Time of 0.3% O <sub>2</sub> exposure (hours) | 0 | 0 | 0 | 4 | 0  | 20 |

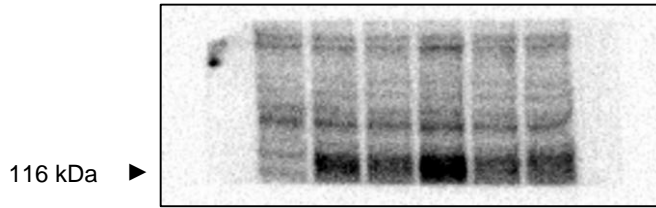

**Total protein**

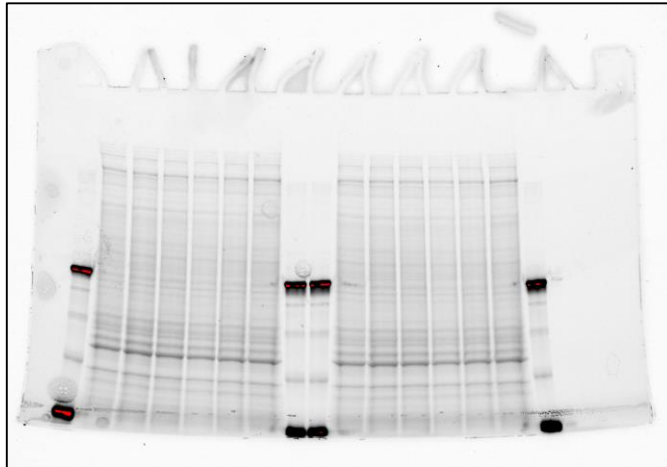

**Replicate 2**

**HIF-1 $\alpha$**

|                                              |   |   |   |   |    |    |
|----------------------------------------------|---|---|---|---|----|----|
| Time of hypoxic exposure (hours)             | 0 | 4 | 8 | 8 | 24 | 24 |
| Time of 0.3% O <sub>2</sub> exposure (hours) | 0 | 0 | 0 | 4 | 0  | 20 |

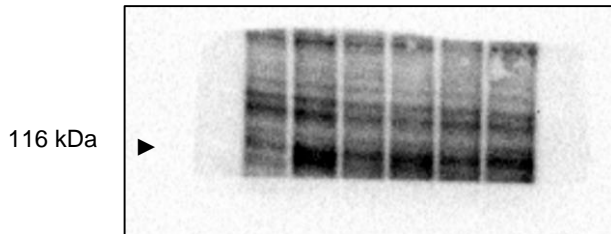

**HIF-2 $\alpha$**

|   |   |   |   |    |    |
|---|---|---|---|----|----|
| 0 | 4 | 8 | 8 | 24 | 24 |
| 0 | 0 | 0 | 4 | 0  | 20 |

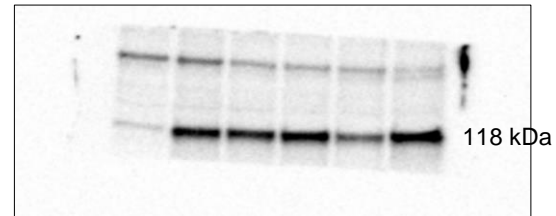

**Total protein**

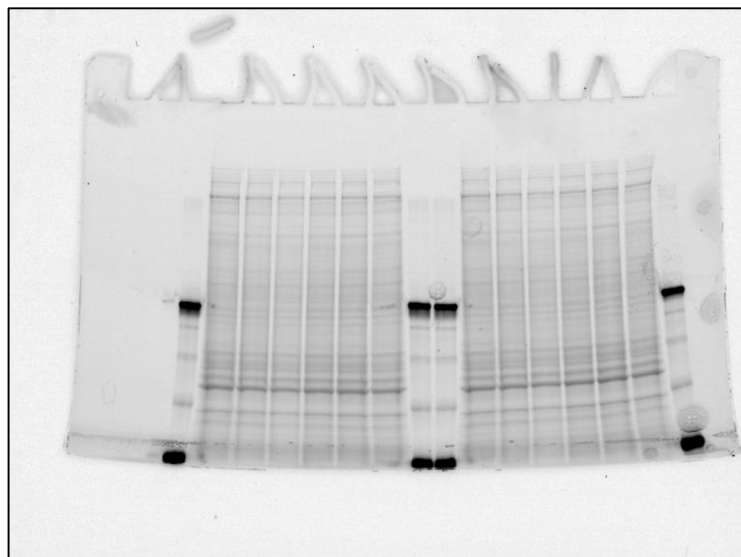

**Supplemental material for Figure 6 – uncropped Western blots**

**Replicate 3**

**HIF-1 $\alpha$**

**HIF-2 $\alpha$**

Time of hypoxic exposure (hours) 0 4 8 8 24 24  
 Time of 0.3% O<sub>2</sub> exposure (hours) 0 0 0 4 0 20

0 4 8 8 24 24  
 0 0 0 4 0 20

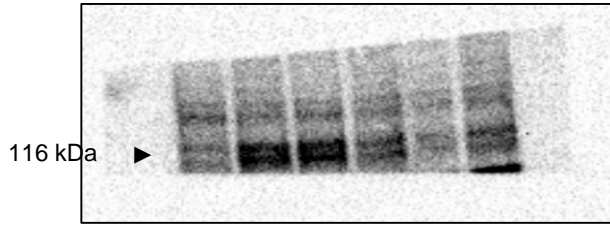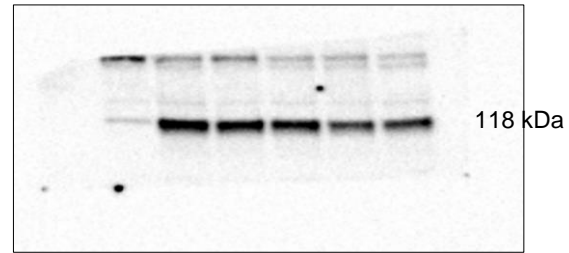

**Total protein**

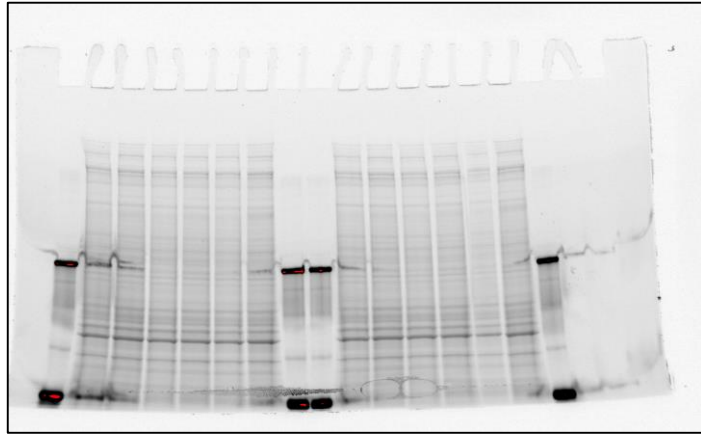

**Replicate 4**

**HIF-2 $\alpha$**

Time of hypoxic exposure (hours) 0 4 8 8 24 24  
 Time of 0.3% O<sub>2</sub> exposure (hours) 0 0 0 4 0 20

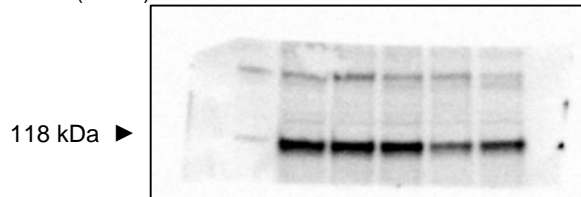

**Total protein**

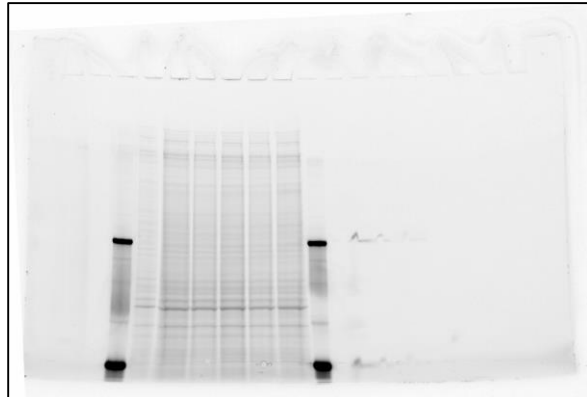

**Supplemental material for Figure 6 – uncropped Western blots**

**Replicate 5**

**HIF-1 $\alpha$**

|                                              |   |   |   |   |    |    |
|----------------------------------------------|---|---|---|---|----|----|
| Time of hypoxic exposure (hours)             | 0 | 4 | 8 | 8 | 24 | 24 |
| Time of 0.3% O <sub>2</sub> exposure (hours) | 0 | 0 | 0 | 4 | 0  | 20 |

116 kDa ▶

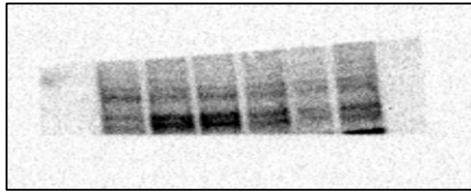

**HIF-2 $\alpha$**

|   |   |   |   |    |    |
|---|---|---|---|----|----|
| 0 | 4 | 8 | 8 | 24 | 24 |
| 0 | 0 | 0 | 4 | 0  | 20 |

118 kDa

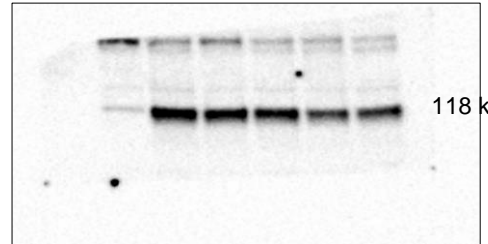

**Total protein**

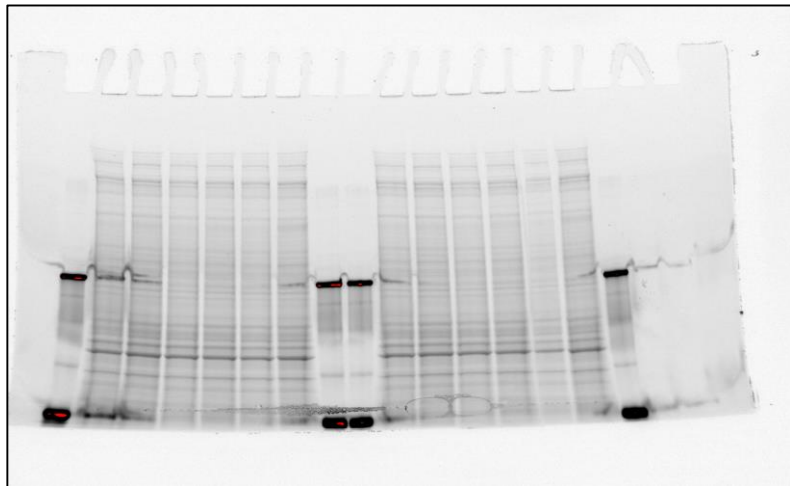

Supplement: 11658_2022_408_MOESM6_ESM.pdf [file 11658_2022_408_MOESM6_ESM.pdf]
